# Supplementary material for: Copper nanowire-derived one-dimensional hollow copper sulfides as electrode materials for sodium-ion batteries
Source: Royal Society of Chemistry journal article supplement (doi:10.1039/d2ce00245k), 2022-01-01
Supplement: d2ce00245k1.pdf [file d2ce00245k1.pdf]

## Copper Nanowires-Derived One-dimensional Hollow Copper Sulfides as Electrode Materials for Sodium-Ion Batteries

Yutao Jiang, Yarong Gu, Jinfeng Liu, Bingkun Guo, and Lijuan Zhao\*

Materials Genome Institute, Shanghai University, Shanghai 200444, P. R. China

\*Corresponding author: [lijuanzhao@t.shu.edu.cn](mailto:lijuanzhao@t.shu.edu.cn)

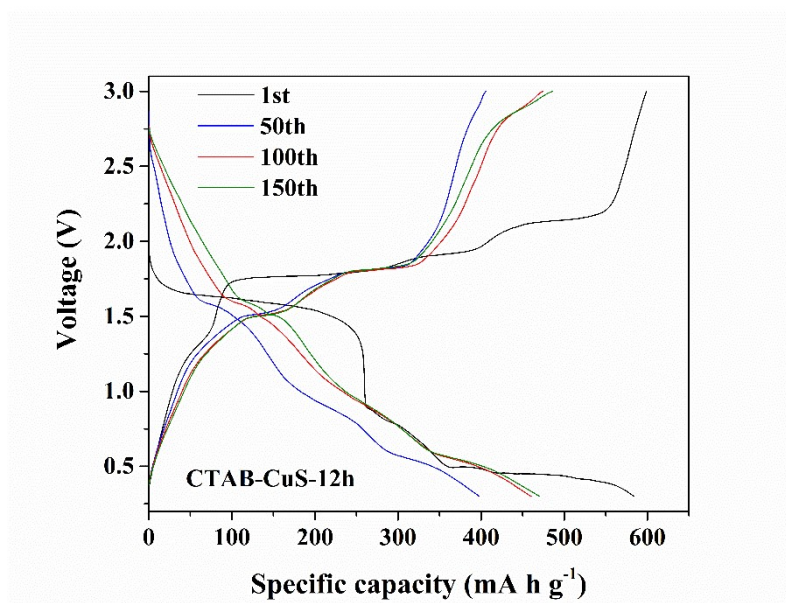

Galvanostatic discharge-charge curves of CTAB-CuS-12h electrode.
